# Supplementary material for: β-Caryophyllene Acts as a Ferroptosis Inhibitor to Ameliorate Experimental Colitis
Source: MDPI journal article supplement (doi:10.3390/ijms232416055), 2022-12-16
Supplement: s1 [file s1]

# **$\beta$ -Caryophyllene acts as a ferroptosis inhibitor to ameliorate experimental colitis**

## **Supplementary Tables**

**Table S1 List of primary antibodies for immunoblot, immunohistochemistry or Immunofluorescence**

| <b>Name</b>                                        | <b>Supplier</b> | <b>item number</b> |
|----------------------------------------------------|-----------------|--------------------|
| 4-HNE                                              | Abcam           | Cat # ab46545      |
| ACSL4                                              | Santa Cruz      | Cat # sc-271800    |
| APC anti-mouse F4/80                               | Biolegend       | Cat # 123115       |
| APC/Fire™ 750 anti-mouse/human CD11b               | Biolegend       | Cat # 101262       |
| Brilliant Violet 421 anti-mouse F4/80              | Biolegend       | Cat # 123131       |
| COX2                                               | CST             | Cat # 12282        |
| Erk1/2 MAPK (137F5)                                | CST             | Cat # 4695         |
| F4/80                                              | Servicebio      | Cat # GB113373     |
| FTH1 (D1D4)                                        | CST             | Cat # 4393         |
| GPX4                                               | Abcam           | Cat # ab125066     |
| IKK $\beta$ (D30C6)                                | CST             | Cat # 8943         |
| I $\kappa$ B $\alpha$ (L35A5)                      | CST             | Cat # 4814         |
| JNK                                                | CST             | Cat # 9252         |
| NF- $\kappa$ B p65 (D14E12)                        | CST             | Cat # 8242         |
| p38 MAPK                                           | CST             | Cat # 9212         |
| Phospho-Erk1/2 MAPK (Thr202/Tyr204)                | CST             | Cat # 4370         |
| Phospho-IKK $\alpha$ (Ser176)/IKK $\beta$ (Ser177) | CST             | Cat # 2078         |
| Phospho-I $\kappa$ B $\alpha$ (Ser32/36)           | CST             | Cat # 9246         |
| Phospho-SAPK/JNK (Thr183/Tyr185)                   | CST             | Cat # 9255         |
| Phospho-NF- $\kappa$ B p65 (Ser536)                | CST             | Cat # 3033         |
| Phospho-p38 MAPK (Thr180/Tyr182)                   | CST             | Cat # 4511         |
| $\alpha$ CT/SLC7A11 (D2M7A)                        | CST             | Cat # 12691        |
| $\beta$ -Actin                                     | CST             | Cat # 4970         |

**Table S2. The RT-qPCR sequences used in the study**

| <b>Genes</b>  | <b>Primer sequences (5'→3')</b>                          |
|---------------|----------------------------------------------------------|
| Acs14         | F: CTCACCATATATATGCTGCCTGT<br>R: TCTCTTTGCCATAGCGTTTTTCT |
| Fth1          | F: TGCCTCCTACGTCTATCTGTC<br>R: GTCATCACGGTCTGGTTTCTTT    |
| Gpx4          | F: GCCTGGATAAGTACAGGGGT<br>R: CATGCAGATCGACTAGCTGAG      |
| Gapdh         | F: TGTGTCCGTCGTGGATCTGA<br>R: CCTGCTTCACCACCTTCTTGA      |
| Hamp          | F: TGCCTGTCTCCTGCTTCT<br>R: TGTCTGCCCTGCTTTCTT           |
| Il-1 $\beta$  | F: CTGGTGTGTGACGTTCCCATTA<br>R: CCGACAGCACGAGGCTTT       |
| Il-6          | F: CCAGTTGCCTTCTTGGGACT<br>R: GGTCTGTTGGGAGTGGTATCC      |
| Ptgs2         | F: GGCCATGGAGTGGACTTAAA<br>R: ACCTCTCCACCAATGACCTG       |
| Slc7a11       | F: CTTTGTTGCCCTCTCCTGCTTC<br>R: CAGAGGAGTGTGCTTGTGGACA   |
| Tnf- $\alpha$ | F: CAAAATTTCGAGTGACAAGCCTG<br>R: GAGATCCATGCCGTTGGC      |

## Supplementary figures

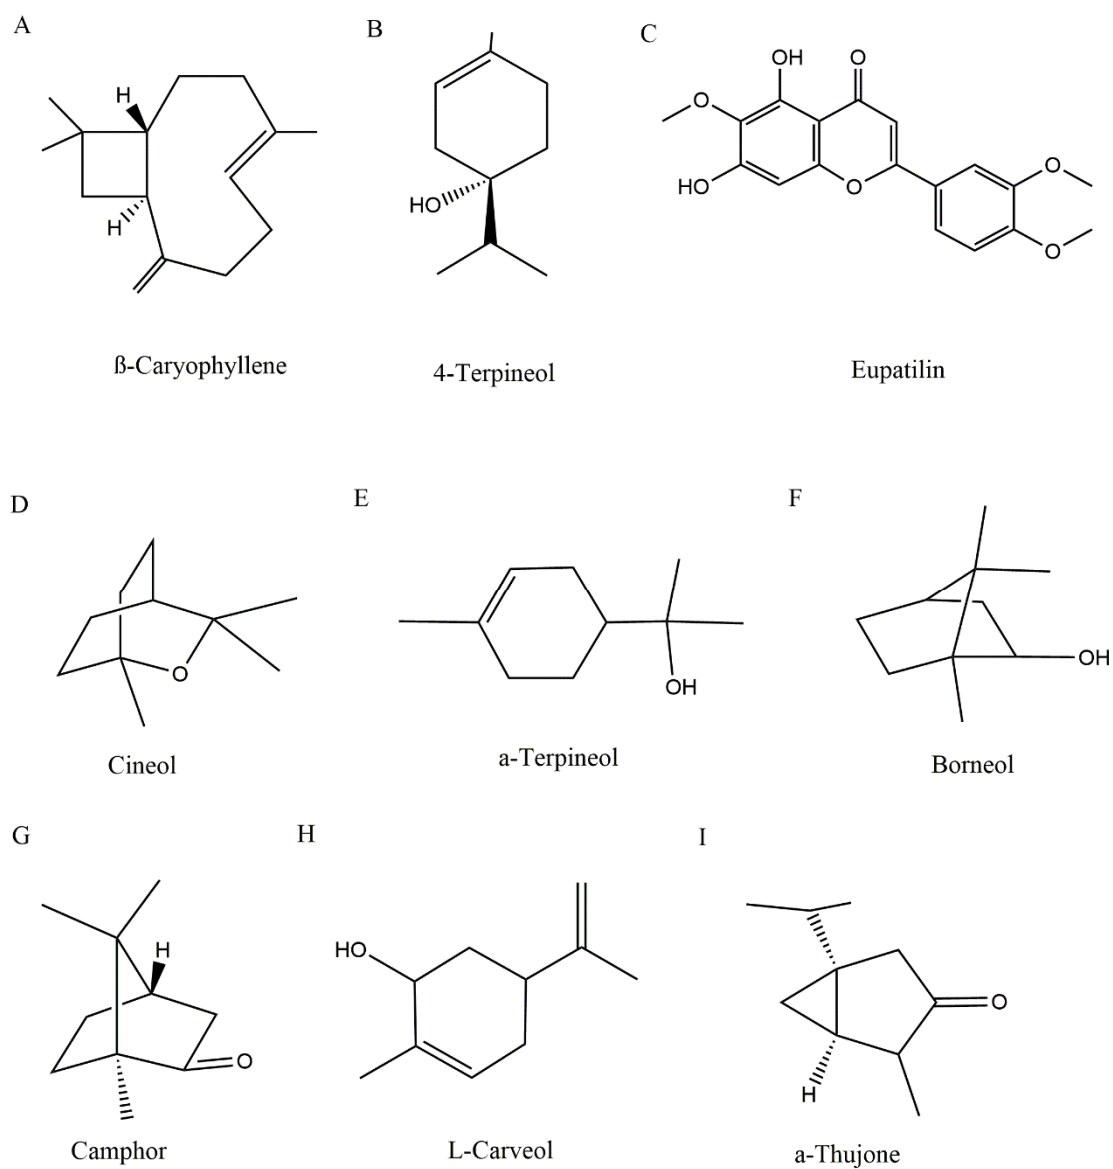

**Figure S1. The major small molecule compounds in the essential oil of *Artemisia argyi* used in this study. Molecular structure of (A), β-Caryophyllene; (B), 4-Terpineol; (C), Eupatilin; (D), Cineol; (E), α-Terpineol; (F), Borneol; (G), Camphor; (H), L-Carveol or (I), Thujone.**

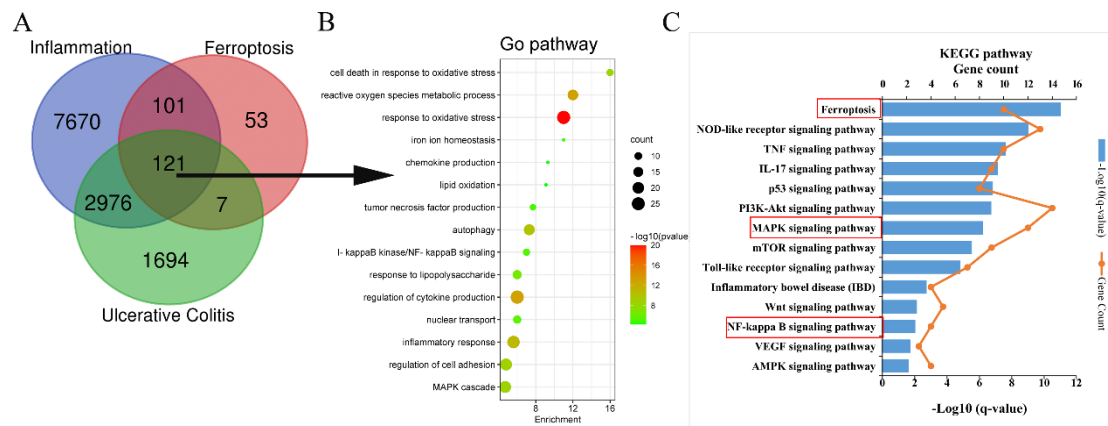

**Figure S2. Functional enrichment analysis of inflammation, ulcerative colitis and ferroptosis.** (A), A total of 10,868 inflammation-related genes, 282 ferroptosis-related genes and 4,798 UC-related genes were identified using the GeneCards database. (B&C), GO and KEGG functional enrichment analysis of common genes among inflammation, ulcerative colitis and ferroptosis.

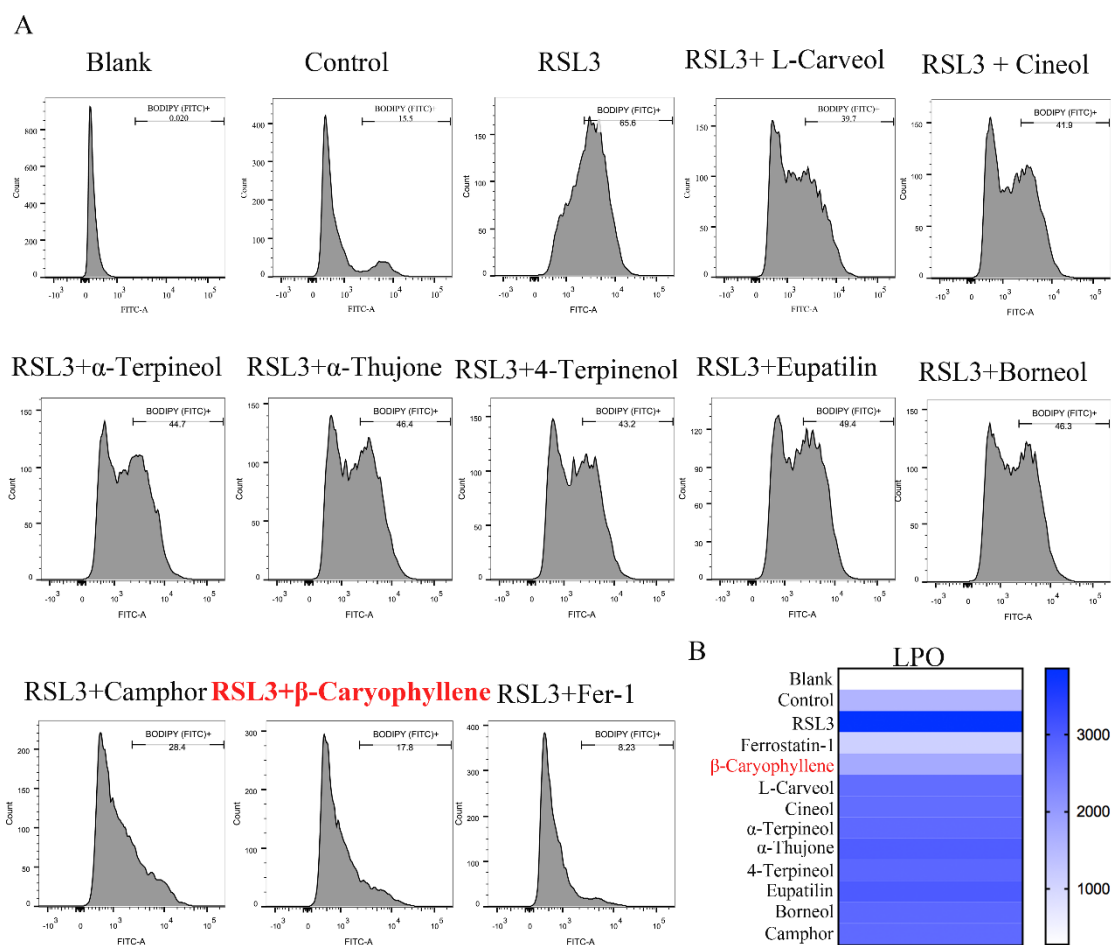

**Figure S3. Screening of main components of essential oil from *Artemisia argyi* leaf against lipid peroxidation. (A&B), Representative flow cytometry images, percentage of lipid ROS and fluorescence intensity showing lipid peroxidation after different treatments.**

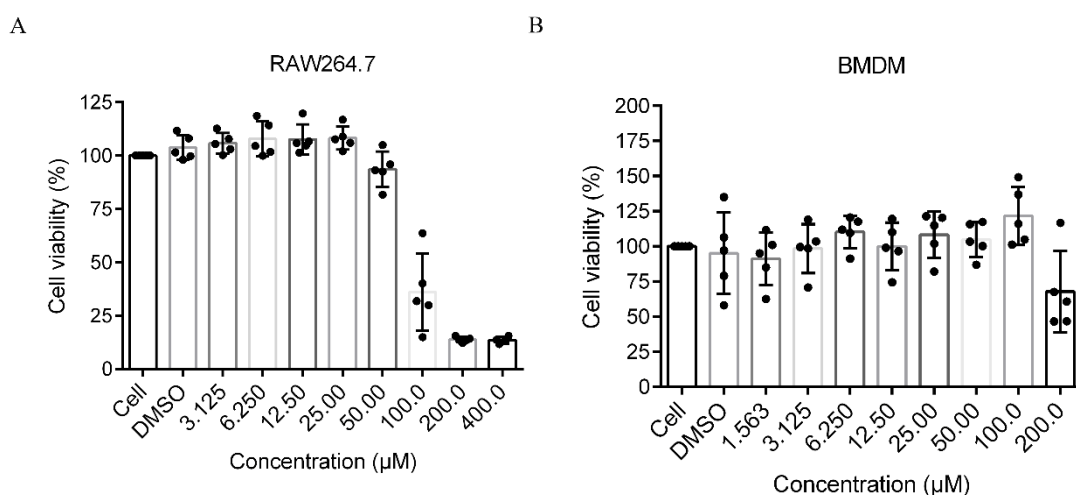

**Figure S4. Effects of BCP on cell viability of RAW 264.7 macrophages and BMDMs. Data are representative of five independent experiments.**

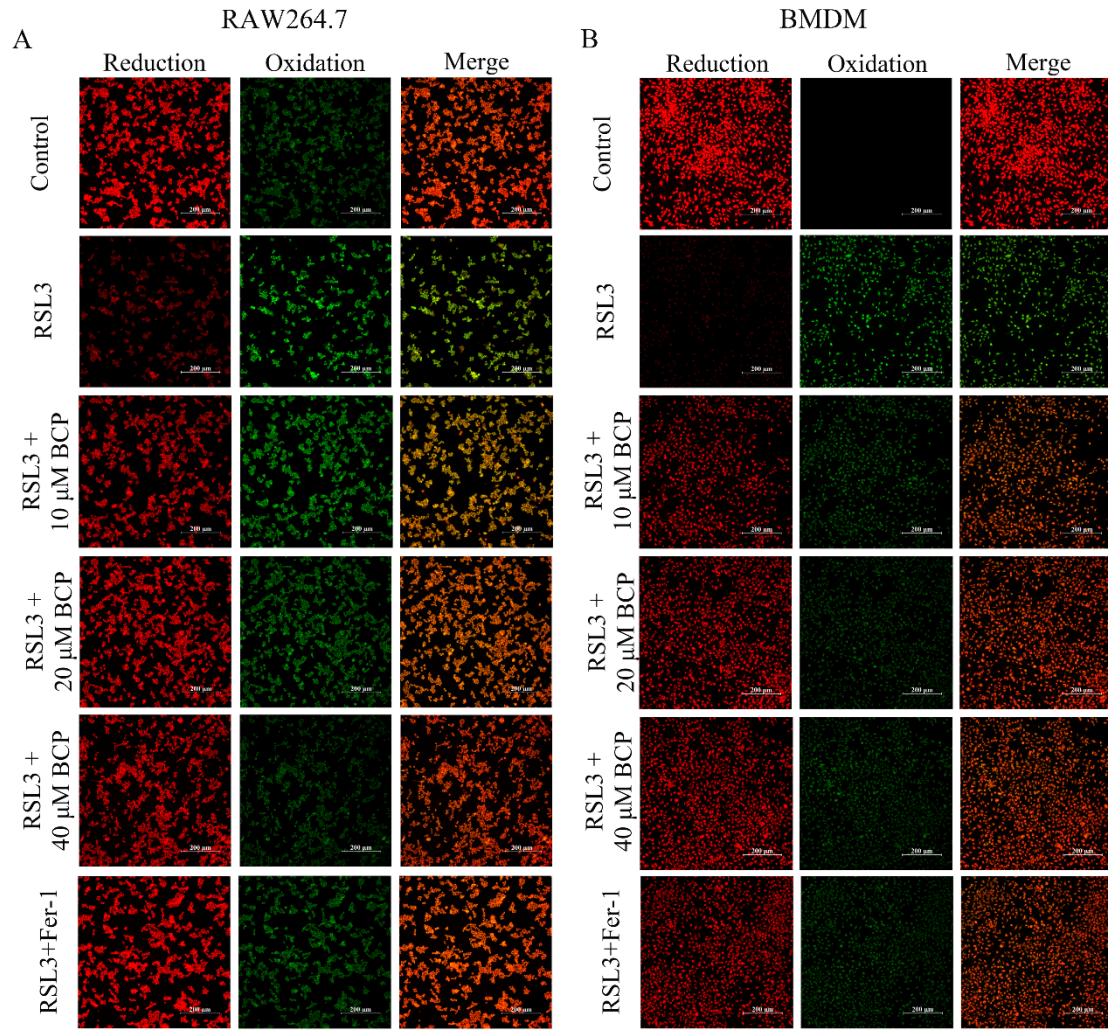

**Figure S5. BCP exerts an inhibitory effect on RSL3-induced lipid peroxidation.** RAW264.7 macrophages or BMDMs were treated with 500 nM RSL3 in the presence of different concentrations of BCP or 400 nM Fer-1 for 6 h. (A&B), Representative C11-BODIPY staining images showing lipid peroxidation of RAW264.7 macrophages and BMDMs. Scale bar, 200  $\mu$ m. Data are representative of three independent experiments.

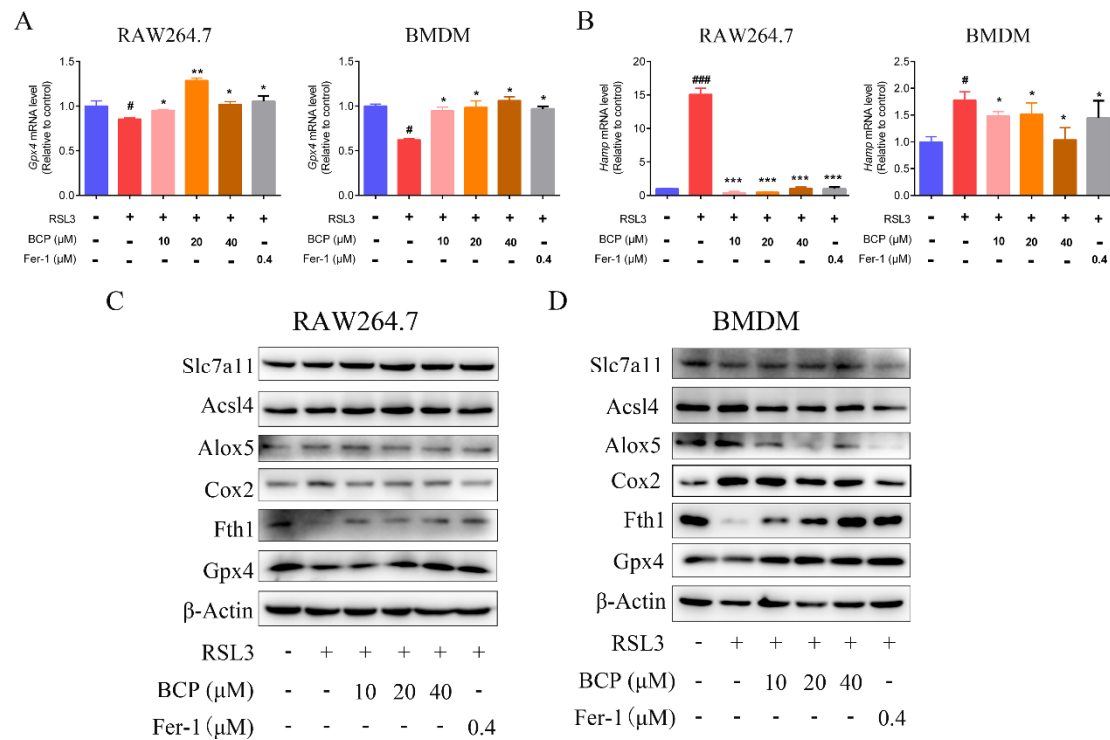

**Figure S6. BCP regulates the expression of ferroptosis-related genes and proteins.** RAW264.7 macrophages or BMDMs were treated with 500 nM RSL3 in the presence of different concentrations of BCP or 400 nM Fer-1 for 6 h. (A&B), Relative mRNA levels of Gpx4 and Hamp in RAW264.7 macrophages and BMDMs were detected by qRT-PCR. Data are presented as mean  $\pm$  S.E.M. using Gapdh as a reference. # $p < 0.05$ , ### $p < 0.001$  versus control group; \* $p < 0.05$ , \*\* $p < 0.01$ , \*\*\* $p < 0.001$  versus RSL3 treatment group. (C&D), Relevant protein levels of ferroptosis in RAW264.7 macrophages and BMDMs were analyzed by immunoblotting.  $\beta$ -Actin was used as an internal reference.

A

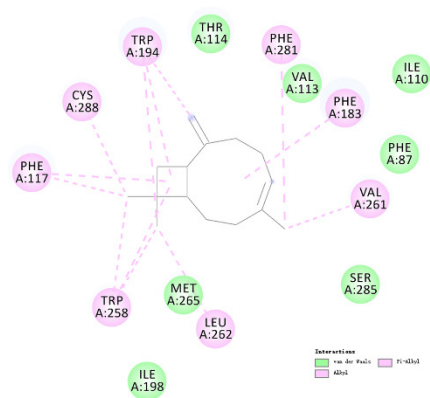

B

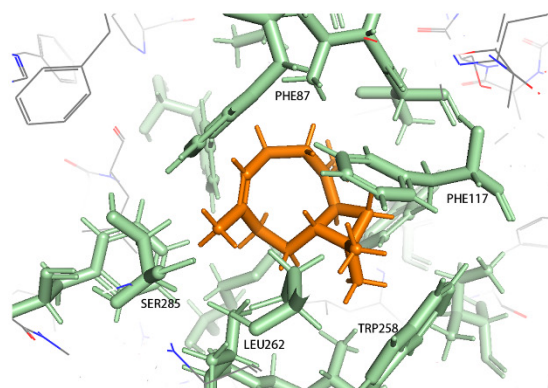

**Figure S7. Molecular docking diagram of BCP binding to the CB2R. (A &B), 2D interaction plot and 3D interaction plot.**



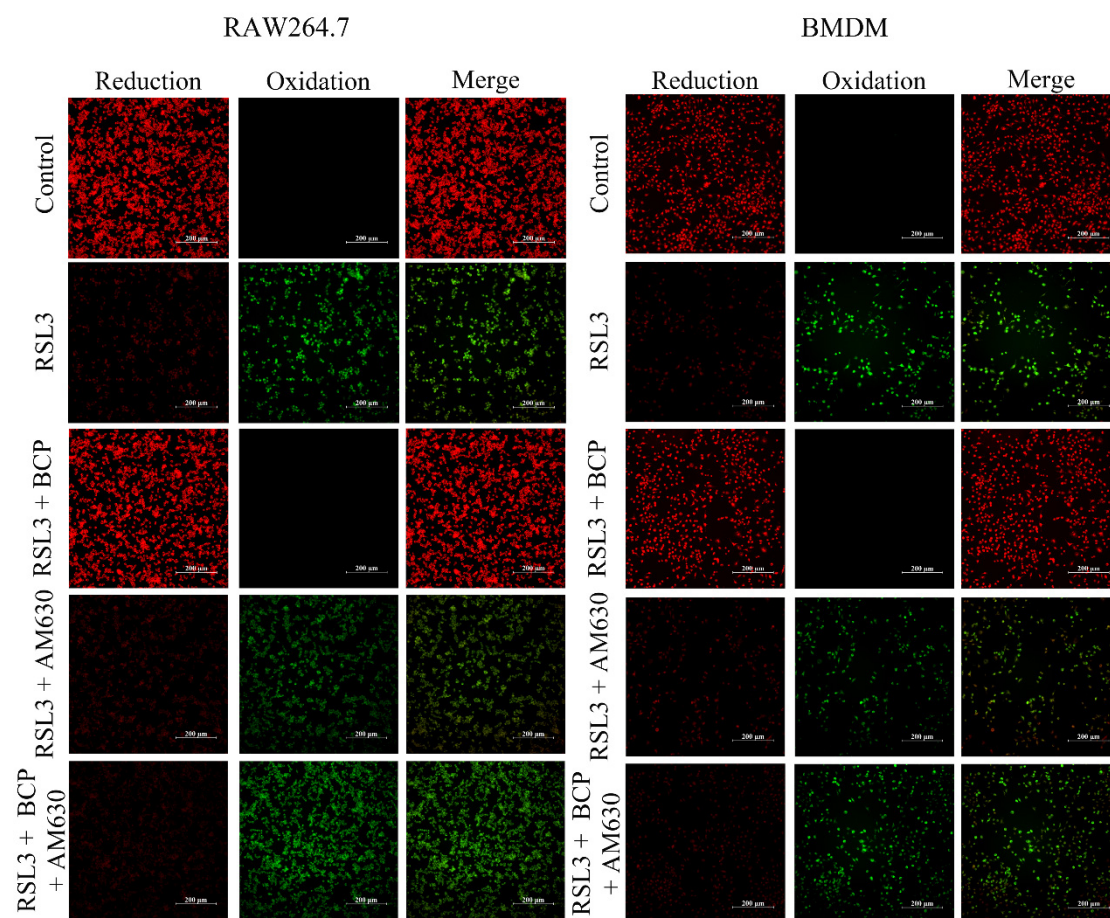

**Figure S8. BCP inhibits RSL3-induced lipid peroxidation by activating the CB2R.** RAW264.7 macrophages or BMDMs were treated with 500 nM RSL3 in the presence of BCP (20  $\mu$ M), CB2R antagonist AM630 (5  $\mu$ M) or both of AM630 and BCP for 6 h. Representative C11-BODIPY staining images showing lipid peroxidation of RAW264.7 macrophages and BMDMs. Scale bar, 200  $\mu$ m. Data are representative of three independent experiments.

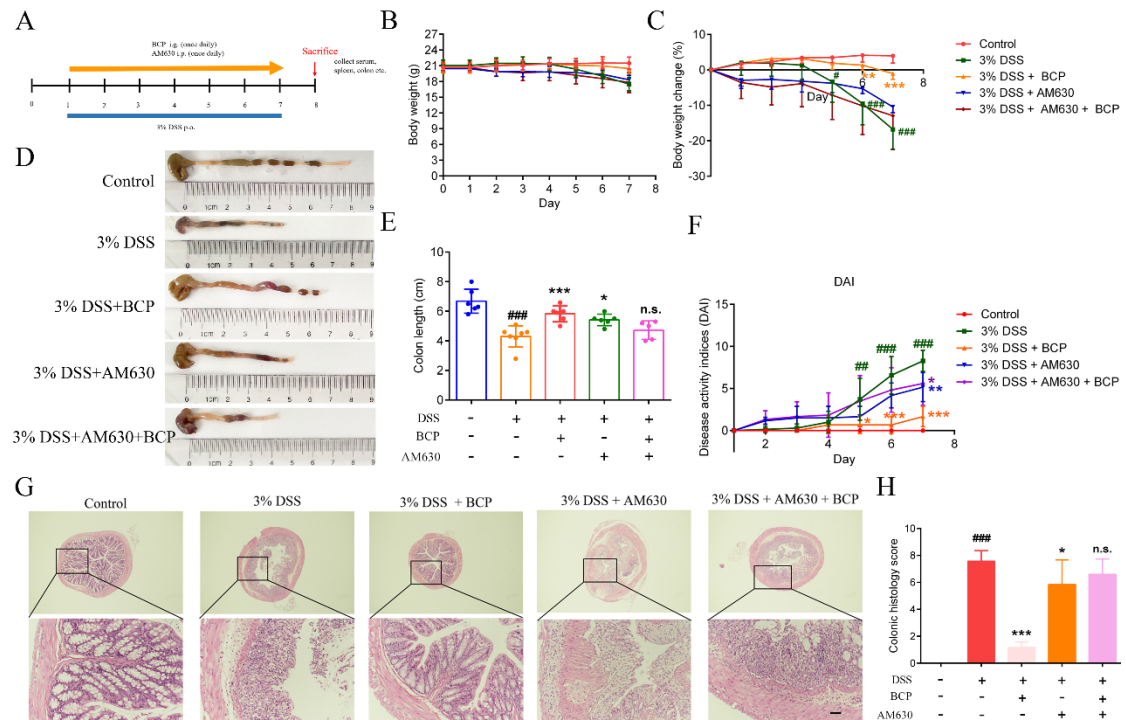

**Figure S9. BCP mitigates DSS-induced ulcerative colitis via activation of the CB2R.** Mice were given 3% DSS for 7 days and were treated with BCP (50 mg/kg, p.o.) alone, with the CB2R selective antagonist AM630 alone, or with AM630 (30 minutes before) plus BCP. (A), Diagram of the in vivo study design. B&C, Body weight and body weight changes of mice in different treatments. (D&E), Comparison of colon length and graphs of colon length. (F), DAI were determined according to scoring standards. (G&H), HE staining of colonic tissues and colonic histology score were analyzed after the last administration. Scale bar, 50  $\mu$ m. Data are presented as the mean  $\pm$  S.E.M. of 6 colonic tissues samples. Statistical analyses were performed with one-way ANOVA. # $p$  < 0.05, ## $p$  < 0.01, ### $p$  < 0.001 versus mice from control group; \* $p$  < 0.05, \*\* $p$  < 0.01, \*\*\* $p$  < 0.001 versus mice from 3% DSS group.

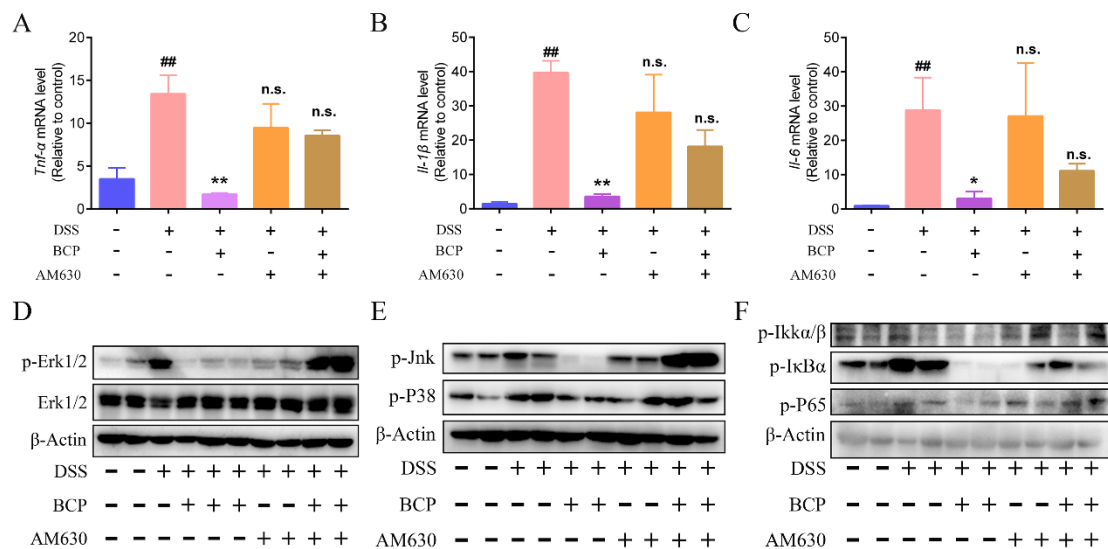

**Figure S10. BCP suppresses the DSS-induced inflammatory response by activating CB2R.** (A-C), Relative mRNA expression levels of *Tnf-α*,

Il-1 $\beta$  and Il-6 in colonic tissues were determined by RT-qPCR. Data are presented as the mean  $\pm$  S.E.M. of 6 colonic tissues samples using Gapdh as a reference. **(D-F)**, Levels of p-Erk1/2, Erk1/2, p-Jnk, p-P38, p-Ikka/ $\beta$ , p-IkB $\alpha$  and p-P65 in mice with DSS-induced colitis treated with BCP or AM630 were determined by western blot analysis.  $\beta$ -Actin was used as an internal reference. Statistical analyses were performed with one-way ANOVA. ##p < 0.01 versus mice from control group; \*p < 0.05, \*\*p < 0.01 versus mice from 3% DSS group.
